# Supplementary material for: Trilayer organic narrowband photodetector with electrically-switchable spectral range and color sensing ability
Source: Royal Society of Chemistry journal article supplement (doi:10.1039/d0tc04893c), 2021-01-01
Supplement: d0tc04893c1.pdf [file d0tc04893c1.pdf]

## Supporting Information

### Trilayer organic narrowband photodetector with electrically-switchable spectral range and color sensing ability

Dong Shen,<sup>a</sup> Zhiqiang Guan,<sup>b</sup> Menglin Li,<sup>b</sup> Sai-Wing Tsang,<sup>b</sup> Wenjun Zhang,<sup>b</sup> Ming-Fai Lo, <sup>\*a</sup> and Chun-Sing Lee<sup>\*a</sup>

a. Center of Super-Diamond and Advanced Films (COSDAF) and Department of Chemistry, City University of Hong Kong, Hong Kong SAR, P. R. China. E-mail: mingflo@cityu.edu.hk; apcslee@cityu.edu.hk

b. Center of Super-Diamond and Advanced Films (COSDAF) and Department of Materials Science and Engineering, City University of Hong Kong, Hong Kong SAR, P. R. China

E-mail: mingflo@cityu.edu.hk; apcslee@cityu.edu.hk

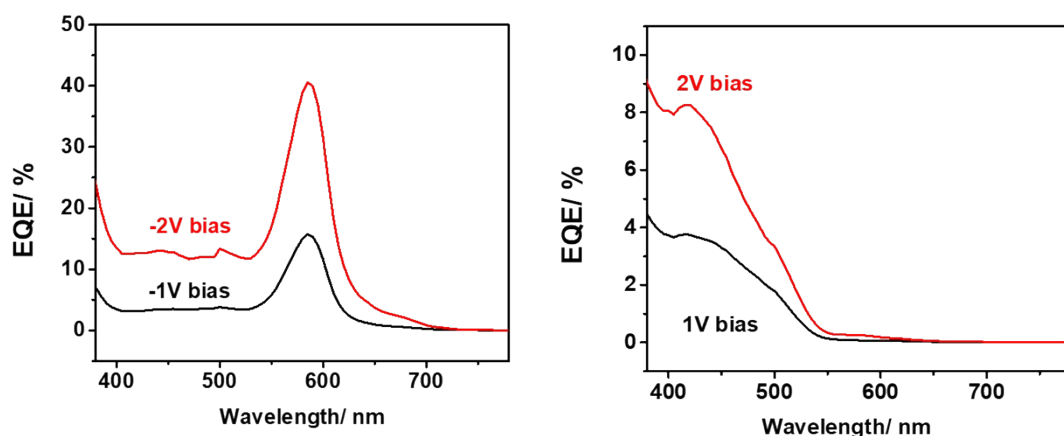

**Fig. S1.** EQE of the device under -1V, -2V, 1V, 2V, respectively.

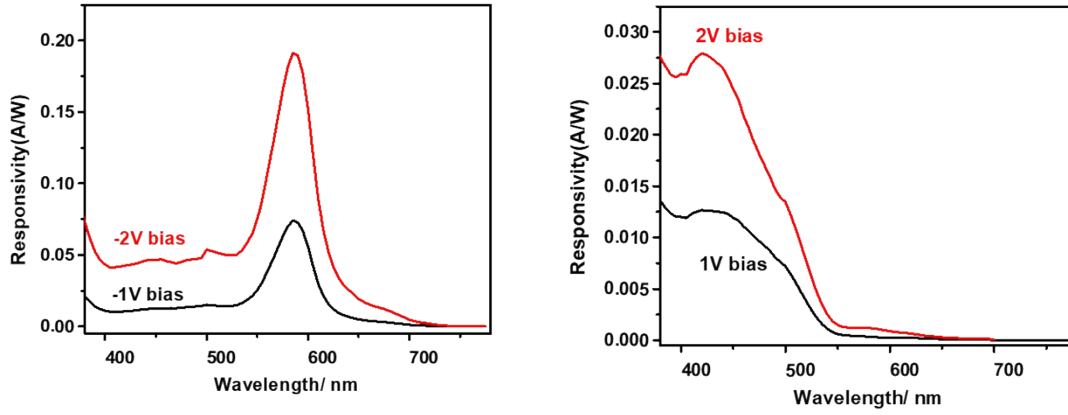

**Fig. S2.** Responsivities of the device under -1V, -2V, 1V, 2V, respectively.

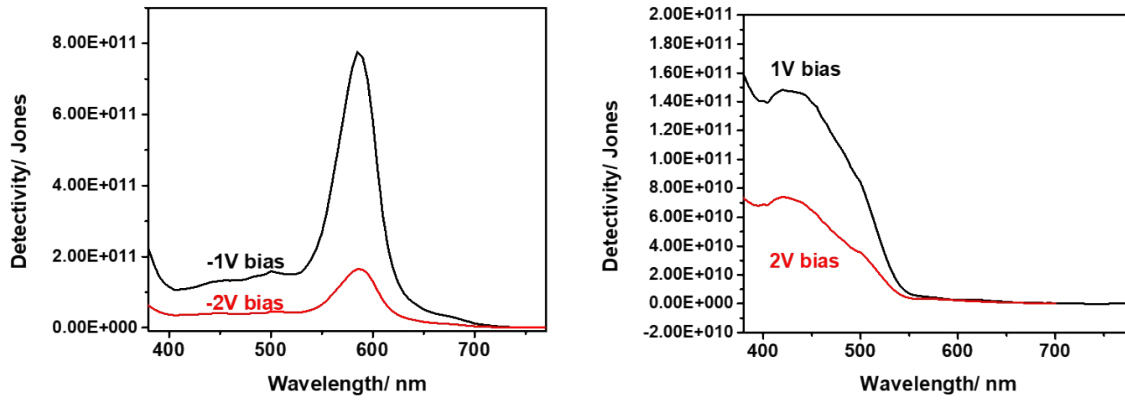

**Fig. S3.** Detectivities of the device under -1V, -2V, 1V, 2V, respectively.

Assuming the shot noise from the dark current is the main contribution of the noise source, the detectivities were calculated from the equation<sup>1</sup>:

$$D^* = R / (2qJ_d)^{1/2}$$

where  $R$  is the responsivity,  $q$  is the elemental charge and  $J_d$  is the dark current.

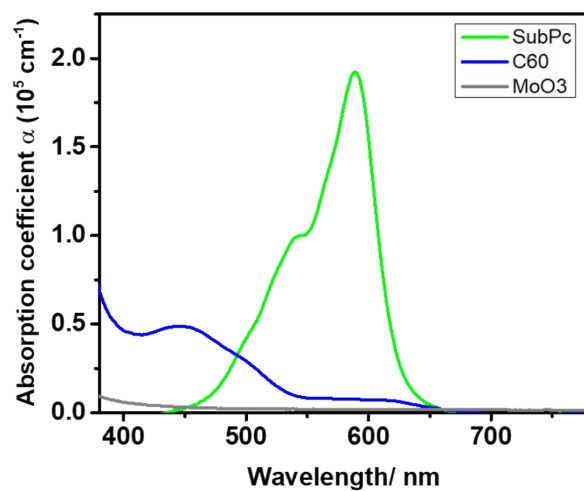

**Fig. S4.** Absorption coefficients of SubPc, C<sub>60</sub> and MoO<sub>3</sub>

## References

1. X. Gong, M. Tong, Y. Xia, W. Cai, J. S. Moon, Y. Cao, G. Yu, C.-L. Shieh, B. Nilsson and A. J. Heeger, *Science*, 2009, 325, 1665-1667.
